# Supplementary material for: The KSR2-calcineurin complex regulates STIM1-ORAI1 dynamics and store-operated calcium entry (SOCE)
Source: PubMed Central journal article supplement — Mol Biol Cell. 2014 Jun 1;25(11):1769–81. doi: 10.1091/mbc.E13-05-0292 (PMC4038503; doi:10.1091/mbc.e13-05-0292), 2014-06-01
Supplement: supp_E13-05-0292v1_CombinedSupMats.pdf [file supp_E13-05-0292v1_CombinedSupMats.pdf]

# Supplemental Materials

*Molecular Biology of the Cell*

Giurisato et al.

**Supplementary Figure 1.** Purified T and B cells isolated from *wt*, *ksr1*<sup>-/-</sup> and *ksr2*<sup>-/-</sup> mice were stained for the surface markers CD3ε (T cells) and B220 (B cells). The percentage of T and B cells present in each purification, analyzed by FACS, is reported for each condition tested.

**Supplementary Figure 2.** Purified T and B lymphocytes, loaded with Fura-2, were resuspended, in a spectrofluorimeter cuvette, in a nominally Ca<sup>2+</sup> free medium containing 0.2 mM EGTA. A magnification of the Tg and agonist-induced Ca<sup>2+</sup> elevation is shown for T and B lymphocytes. (A, C) Intracellular Ca<sup>2+</sup> stores were depleted with 0.2 μM thapsigargin (Tg); (B, D) elevation of [Ca<sup>2+</sup>]<sub>i</sub> was induced by anti-CD3 (2C11) followed by anti-IgG antibody (α-hamster) or by anti-IgM stimulation, for T and B lymphocytes, respectively. The area under the curve (AUC) of the average trace obtained after stimulation with specific agonist, from three independent experiments, was measured.

**Supplementary Figure 3.** A magnification of the TG-induced Ca<sup>2+</sup>-release, in the absence of external calcium, and the corresponding AUC values, in shRNA control (scr) and shRNA-KSR2 expressing HeLa cells is shown. The traces represent the average from at least three independent experiments: the corresponding AUC values are reported.

**Supplementary Figure 4.** (A) Immunoblot illustrating coimmunoprecipitation of STIM1 with ORAI1 puncta. ShRNA control and shRNA KSR2 HeLa cells overexpressing YFP-STIM1 and ORAI1-RFP fusion proteins were incubated without or with 1 μM Tg for 5 minutes. ORAI1 immunoprecipitates (IP) were prepared and analyzed by immunoblotting using anti-STIM1. The membrane was then stripped and reprobed with anti-ORAI1. One representative experiment out of two is shown. (B) KSR2 protein expression in HeLa and COS-7 cells, (1x10<sup>6</sup> cells/lysate). α-Tubulin (α-tub) was used as loading control. Relative molecular mass (kDa) is reported on the left. (C) Intracellular Ca<sup>2+</sup> concentration was monitored, by video imaging, in COS-7 cells expressing low GFP-KSR2 (0.2 μg, green line), high GFP-KSR2 (0.8 μg, red line) or GFP alone (0.2 μg, black line). Ca<sup>2+</sup> stores were depleted with 0.5 μM Tg in the presence of 1.5 mM extracellular Ca<sup>2+</sup>, as evidenced by the peak in Ca<sup>2+</sup> concentration that remained elevated above baseline. Each trace represents the average response of all cells positive for GFP or GFP-KSR2 fluorescence on a single coverslip. The mean ± SEM of Ca<sup>2+</sup> influx value, calculated in >10 transfected COS-7 cells from three independent experiments, is reported. Tg induced intracellular Ca<sup>2+</sup> elevation [Ca<sup>2+</sup>]<sub>i</sub> (nM ± SEM) was monitored in COS-7 cells expressing low GFP-KSR2 (0.2 μg, green line), high GFP-KSR2 (0.8 μg, red line) or GFP (0.2 μg, black line) in the presence of 1.2 mM extracellular Ca<sup>2+</sup>. Δ [Ca<sup>2+</sup>]<sub>i</sub> = ([Ca<sup>2+</sup>]<sub>i</sub> peak after Tg – basal [Ca<sup>2+</sup>]<sub>i</sub>). \*p = 0.044. \*\*p = 0.0128.

**Supplementary Figure 5.** SOCE is reduced by cyclosporin A (CsA) pre-treatment only in KSR2 expressing cells. (Left) (A) Jurkat cells expressing KSR2 protein (as shown in the insert), loaded with Fura-2 were analyzed by spectrofluorimeter. Ca<sup>2+</sup> stores were depleted with 0.2 μM Tg and subsequently, 1.2 mM Ca<sup>2+</sup> was added to the external medium to reveal Ca<sup>2+</sup> influx. Black and red traces represent, respectively, cells treated either without or with 5 μM CsA for 30 min at 37°C. (Right) Cells were pre-treated for 30 min at 37°C with the indicated CsA concentration and peak values of Tg dependent Ca<sup>2+</sup> entry after Ca<sup>2+</sup> readmission were calculated. Panels show percentage of residual Ca<sup>2+</sup> influx after CsA treatment, compared to maximal Ca<sup>2+</sup> peak of their respective vehicle pretreated controls. Values are shown as mean ± SEM of at least three independent experiments.

**Supplementary Figure 6.** KSR2 deficiency and CN inhibition affects cytoskeleton organization. Fibroblasts isolated from *wt* and *ksr2*<sup>-/-</sup> mice were grown on gelatin-covered coverslips. After starvation, cells were either stimulated without (basal) or with 1 μM Tg (+Tg). Where indicated, *wt* cells were pretreated with 10 μM CsA for 30 min and stimulated with 1 μM Tg (CsA+Tg). Cells

were fixed, permeabilized, and incubated with anti- $\alpha$ -tubulin antibody followed by Cy<sup>TM</sup>-2-labeled secondary antibody (green) and Rhodamine-phalloidin (red). One representative cell out of > 25 for each condition in three independent experiments is shown. Bar, 5  $\mu$ m.

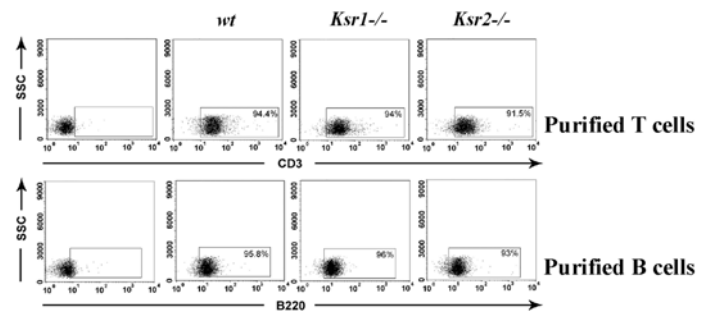

Suppl. figure 1

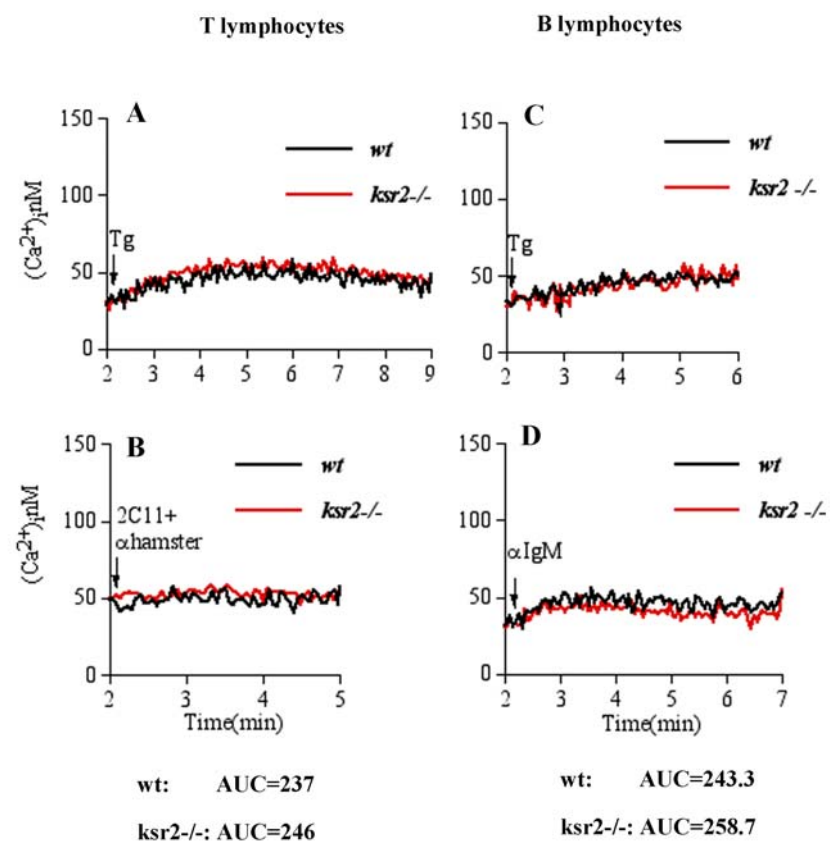

Suppl. figure 2

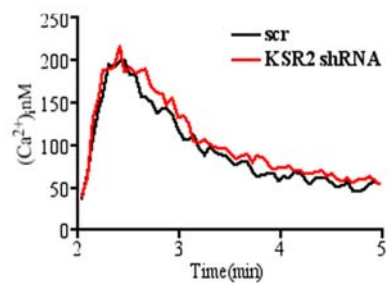

scr: AUC= 284.7

KSR2 shRNA: AUC=314.9

Suppl. figure 3

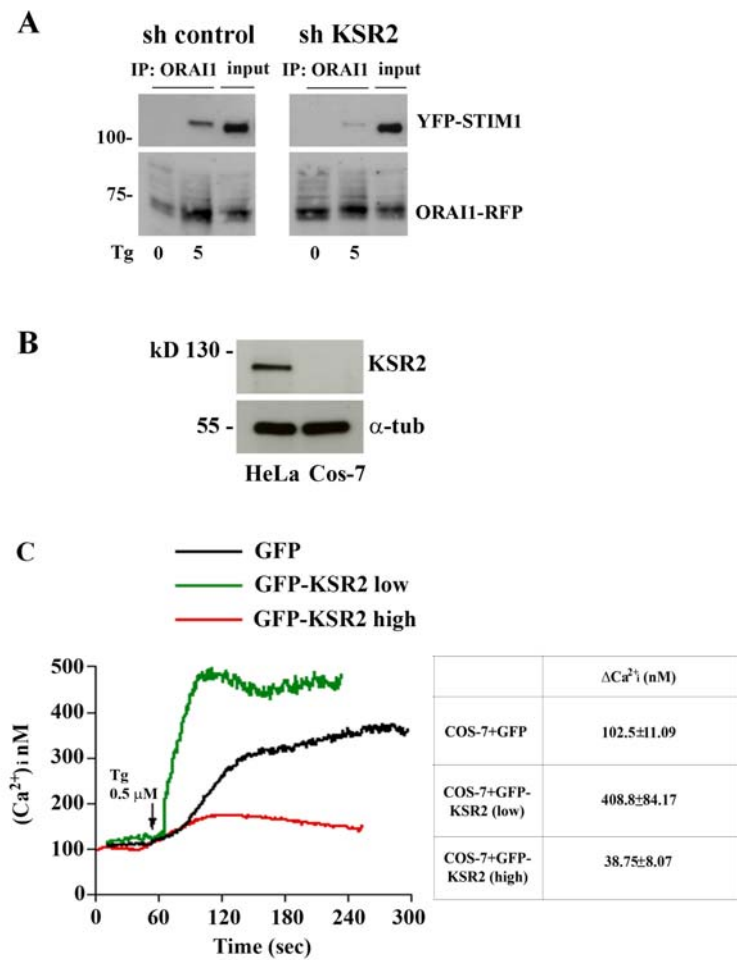

Suppl. figure 4

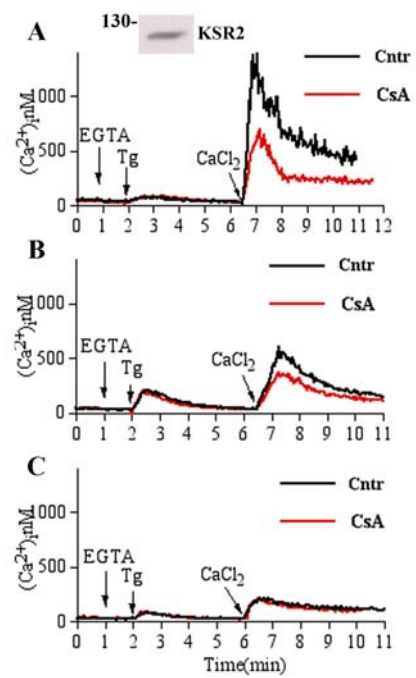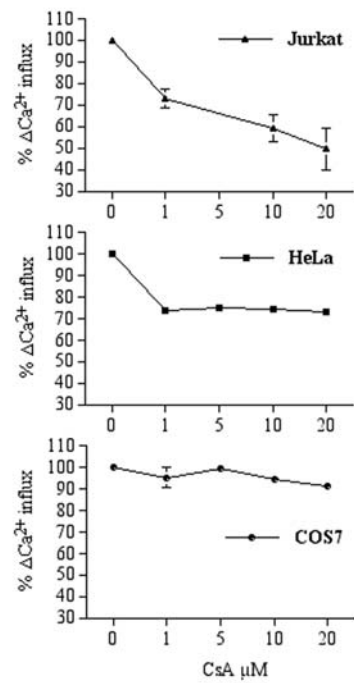



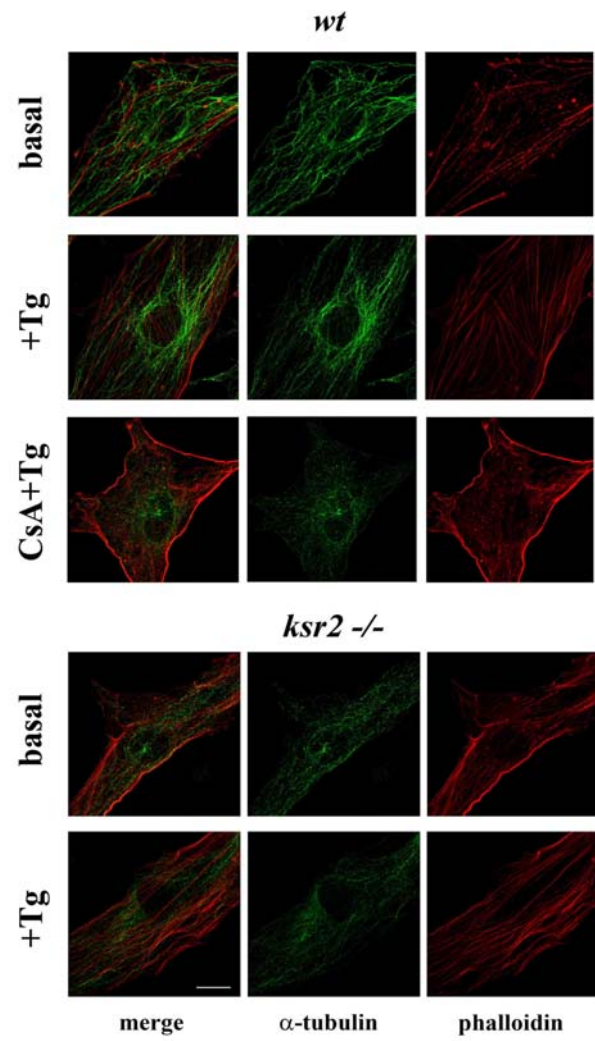

Suppl. figure 6
